# Supplementary material for: Arbuscular Mycorrhizal Fungi-Mediated Modulation of Physiological, Biochemical, and Secondary Metabolite Responses in Hemp (Cannabis sativa L.) under Salt and Drought Stress
Source: MDPI journal article supplement (doi:10.3390/jof10040283), 2024-04-12
Supplement: s1 [file s1]

**Table S1.** Multifactorial analysis of variance (ANOVA) of the effects of inoculation (In), salt concentration (SC) and degree of drought (DD) and their interactions on physiological and biochemical parameters and secondary metabolites of hemp

| Dependent variable | Independent variable |               |               |                       |                       |                       |                                   |
|--------------------|----------------------|---------------|---------------|-----------------------|-----------------------|-----------------------|-----------------------------------|
|                    | <i>In</i>            | <i>SC</i>     | <i>DD</i>     | <i>In</i> × <i>SC</i> | <i>In</i> × <i>DD</i> | <i>SC</i> × <i>DD</i> | <i>In</i> × <i>SC</i> × <i>DD</i> |
| Colonization rate  |                      |               |               |                       |                       |                       |                                   |
| before stress      | 720.143 ***          | -             | -             | -                     | -                     | -                     | -                                 |
| treatment          |                      |               |               |                       |                       |                       |                                   |
| Colonization rate  |                      |               |               |                       |                       |                       |                                   |
| under salt stress  | 64854.825 ***        | 125.894 ***   | 93.492 ***    | 125.894 ***           | 93.492 ***            | 11.946 ***            | 11.946 ***                        |
| and drought        |                      |               |               |                       |                       |                       |                                   |
| stress             |                      |               |               |                       |                       |                       |                                   |
| MD                 | -                    | 293.922 ***   | 368.844 ***   | -                     | -                     | 53.701 ***            | -                                 |
| FW                 | 2440.350 ***         | 620.480 ***   | 860.115 ***   | 68.303 ***            | 69.773 ***            | 59.340 ***            | 36.581 ***                        |
| DW                 | 2364.265 ***         | 951.587 ***   | 948.884 ***   | 68.009 ***            | 94.324 ***            | 30.274 ***            | 51.733 ***                        |
| Height             | 0.011 ns             | 2.576 ns      | 9.901 ***     | 2.371 ns              | 0.783 ns              | 0.530 ns              | 2.450 ns                          |
| SD                 | 278.388 ***          | 121.206 ***   | 120.313 ***   | 0.166 ns              | 2.031 ns              | 22.047 ***            | 7.741 **                          |
| NB                 | 62.438 ***           | 59.500 ***    | 19.289 ***    | 7.622 **              | 3.267 ns              | 9.800 ***             | 2.022 ns                          |
| RWC                | 58.073 ***           | 121.907 ***   | 81.437 ***    | 22.211 ***            | 0.662 ns              | 0.695 ns              | 2.942 ns                          |
| MDA                | 0.855 ns             | 1690.603 ***  | 370.505 ***   | 141.183 ***           | 8.989 ***             | 67.203 ***            | 46.267 ***                        |
| Pro                | 1097.448 ***         | 7893.807 ***  | 1326.513 ***  | 491.128 ***           | 82.297 ***            | 561.527 ***           | 91.505 ***                        |
| SS                 | 234.740 ***          | 300.804 ***   | 137.608 ***   | 14.847 ***            | 0.474 ns              | 2.405 ns              | 2.335 ns                          |
| SP                 | 110.746 ***          | 11.503 ***    | 53.662 ***    | 65.952 ***            | 33.691 ***            | 71.889 ***            | 86.984 ***                        |
| SPAD               | 451.278 ***          | 437.212 ***   | 355.435 ***   | 60.502 ***            | 30.314 ***            | 4.892 *               | 0.288 ns                          |
| Pn                 | 39.244 ***           | 15679.021 *** | 18604.321 *** | 1323.759 ***          | 21.684 ***            | 187.719 ***           | 132.571 ***                       |

|                                   |               |                |                |              |             |               |              |
|-----------------------------------|---------------|----------------|----------------|--------------|-------------|---------------|--------------|
| Gs                                | 83.668 ***    | 2699.321 ***   | 1945.170 ***   | 298.675 ***  | 116.895 *** | 212.269 ***   | 49.478 ***   |
| Tr                                | 11.192 **     | 2239.073 ***   | 2030.770 ***   | 128.726 ***  | 6.841 **    | 11.998 ***    | 16.808 ***   |
| Ci                                | 40.870 ***    | 260.051 ***    | 868.822 ***    | 305.710 ***  | 14.872 ***  | 67.730 ***    | 2.691 ns     |
| WUE                               | 34.580 ***    | 239.362 ***    | 509.860 ***    | 144.857 ***  | 6.113 **    | 0.253 ns      | 1.867 ns     |
| Fv/Fm                             | 0.141 ns      | 524.566 ***    | 113.776 ***    | 168.154 ***  | 56.047 ***  | 4.278 *       | 11.221 ***   |
| PS(II)                            | 47.700 ***    | 220.083 ***    | 171.057 ***    | 7.892 **     | 10.390 ***  | 3.287 ns      | 2.482 ns     |
| qP                                | 28.563 ***    | 618.246 ***    | 151.960 ***    | 179.776 ***  | 11.316 ***  | 2.856 ns      | 14.571 ***   |
| NPQ                               | 128.041 ***   | 51.985 ***     | 12.940 ***     | 110.697 ***  | 8.295 **    | 14.543 ***    | 10.033 ***   |
| ETR                               | 47.651 ***    | 219.949 ***    | 170.919 ***    | 7.890 **     | 10.386 ***  | 3.288 ns      | 2.479 ns     |
| Na <sup>+</sup>                   | 1457.442 ***  | 25041.592 ***  | 722.523 ***    | 1539.318 *** | 222.805 *** | 899.190 ***   | 248.201 ***  |
| K <sup>+</sup>                    | 45.016 ***    | 2781.287 ***   | 3767.096 ***   | 354.281 ***  | 63.384 ***  | 87.351 ***    | 103.068 ***  |
| Ca <sup>2+</sup>                  | 15.259 ***    | 1267.878 ***   | 642.867 ***    | 177.214 ***  | 18.349 ***  | 11.724 ***    | 25.468 ***   |
| Mg <sup>2+</sup>                  | 26.050 ***    | 1342.470 ***   | 1653.453 ***   | 98.922 ***   | 73.894 ***  | 19.263 ***    | 46.564 ***   |
| Na <sup>+</sup> /K <sup>+</sup>   | 1131.789 ***  | 11513.035 ***  | 575.535 ***    | 1315.140 *** | 81.114 ***  | 439.588 ***   | 96.956 ***   |
| Na <sup>+</sup> /Ca <sup>2+</sup> | 1057.046 ***  | 8237.879 ***   | 270.484 ***    | 1123.866 *** | 60.118 ***  | 243.307 ***   | 58.288 ***   |
| Na <sup>+</sup> /Mg <sup>2+</sup> | 506.302 ***   | 5173.002 ***   | 259.921 ***    | 606.199 ***  | 24.305 ***  | 193.233 ***   | 41.723 ***   |
| Total saponin                     | 105.517 ***   | 165.854 ***    | 13.199 ***     | 22.376 ***   | 4.095 *     | 10.881 ***    | 23.321 ***   |
| Total flavonoids                  | 92.551 ***    | 3.923 *        | 15.651 ***     | 37.547 ***   | 30.534 ***  | 27.957 ***    | 12.415 ***   |
| Total phenols                     | 3.828 ns      | 219.271 ***    | 46.791 ***     | 81.404 ***   | 40.150 ***  | 8.586 **      | 13.565 ***   |
| CBD                               | 23146.304 *** | 217847.505 *** | 159905.261 *** | 6700.303 *** | 968.271 *** | 92494.107 *** | 5011.859 *** |

F-values are followed by P-values; ns  $P > 0.05$ ; \* $P < 0.05$ ; \*\* $P < 0.01$ ; \*\*\* $P < 0.001$

**Table S2.** Growth parameters of hemp under salt stress and drought stress

|      | FW(g)       |              | DW(g)       |             | Height(cm)     |              | SD(mm)         |               | NB(pc)    |          | RWC(%)       |              |
|------|-------------|--------------|-------------|-------------|----------------|--------------|----------------|---------------|-----------|----------|--------------|--------------|
|      | NM          | AM           | NM          | AM          | NM             | AM           | NM             | AM            | NM        | AM       | NM           | AM           |
| CK   | 34.8 ± 1.4b | 37.0 ± 1.5a  | 11.1 ± 0.3a | 11.8 ± 0.4a | 87.7 ± 9.5b    | 88.4 ± 8.9a  | 6.68 ± 0.26b   | 7.52 ± 0.23a  | 15 ± 1b   | 18 ± 1 a | 77.5 ± 0.3cd | 85.7 ± 2.0a  |
| S1   | 22.7 ± 0.6g | 34.3 ± 1.1bc | 7.2 ± 0.2f  | 10.5 ± 0.4c | 81.3 ± 3.8ab   | 84.4 ± 4.5ab | 5.54 ± 0.26e   | 6.56 ± 0.13b  | 13 ± 1cde | 13 ± 1cd | 71.1 ± 1.0e  | 82.9 ± 2.5ab |
| S2   | 12.8 ± 0.4i | 27.8 ± 0.4d  | 3.5 ± 0.2j  | 8.2 ± 0.1e  | 82.3 ± 4.7ab   | 74.2 ± 3.2bc | 4.81 ± 0.05f   | 5.68 ± 0.28de | 9 ± 1f    | 13 ± 1cd | 65.5 ± 0.5fg | 60.9 ± 0.8h  |
| D1   | 19.8 ± 0.6h | 33.2 ± 0.8c  | 6.7 ± 0.1g  | 10.3 ± 0.2c | 83.8 ± 7.5ab   | 84.8 ± 7.0ab | 5.82 ± 0.13cde | 7.24 ± 0.34a  | 12 ± 1de  | 15 ± 1b  | 69.8 ± 0.7e  | 80.4 ± 5.5bc |
| D2   | 12.5 ± 0.9i | 26.3 ± 0.3e  | 4.0 ± 0.2i  | 9.0 ± 0.1d  | 65.3 ± 2.6c    | 82.4 ± 6.4ab | 4.98 ± 0.09f   | 6.02 ± 0.12cd | 12 ± 1de  | 15 ± 1b  | 65.4 ± 1.3fg | 75.3 ± 3.2d  |
| S1D1 | 12.8 ± 0.2i | 27.1 ± 0.4de | 5.0 ± 0.0h  | 7.6 ± 0.3f  | 84.6 ± 6.45ab  | 82.5 ± 5.2ab | 5.98 ± 0.1cd   | 6.63 ± 0.07b  | 11 ± 1e   | 14 ± 1bc | 68.8 ± 1.1ef | 75.0 ± 3.3d  |
| S1D2 | 12.2 ± 0.8i | 24.9 ± 0.5f  | 3.2 ± 0.2j  | 7.6 ± 0.4f  | 76.3 ± 10.3abc | 72.0 ± 9.8bc | 4.69 ± 0.11f   | 6.13 ± 0.22c  | 12 ± 1de  | 12 ± 1de | 62.0 ± 0.6gh | 68.2 ± 1.5ef |

Values in the table represent mean ± S.E. Different letters indicate significant differences between hemp with or without AMF under each treatment.
